# Supplementary material
Source: PubMed Central journal article supplement (PMC10119890)

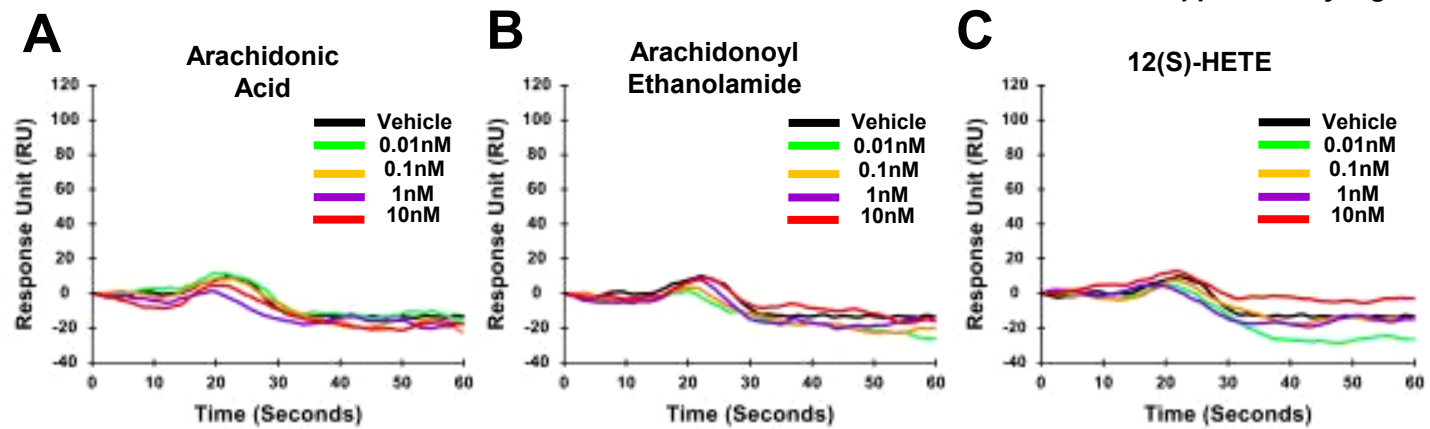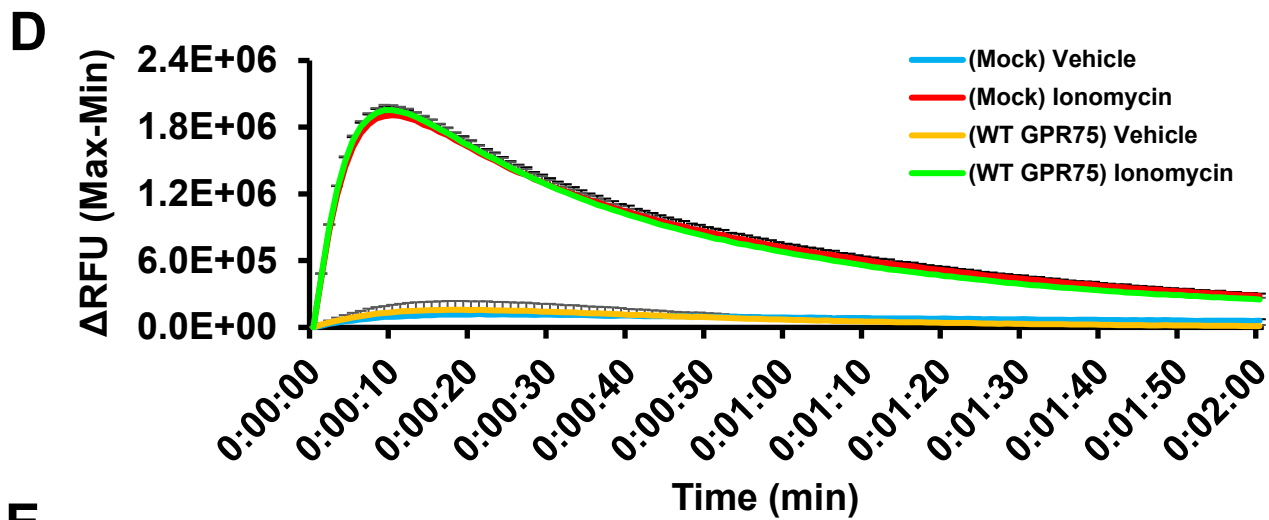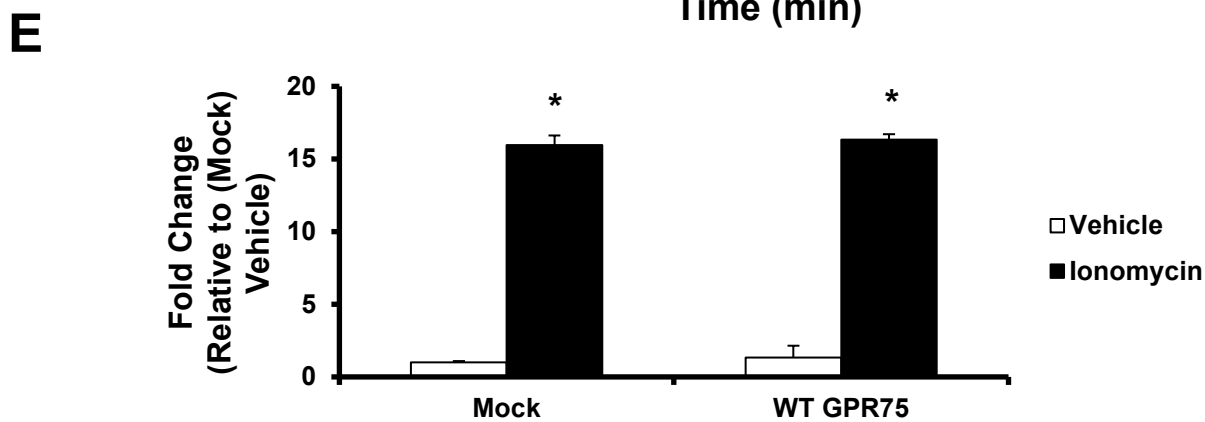

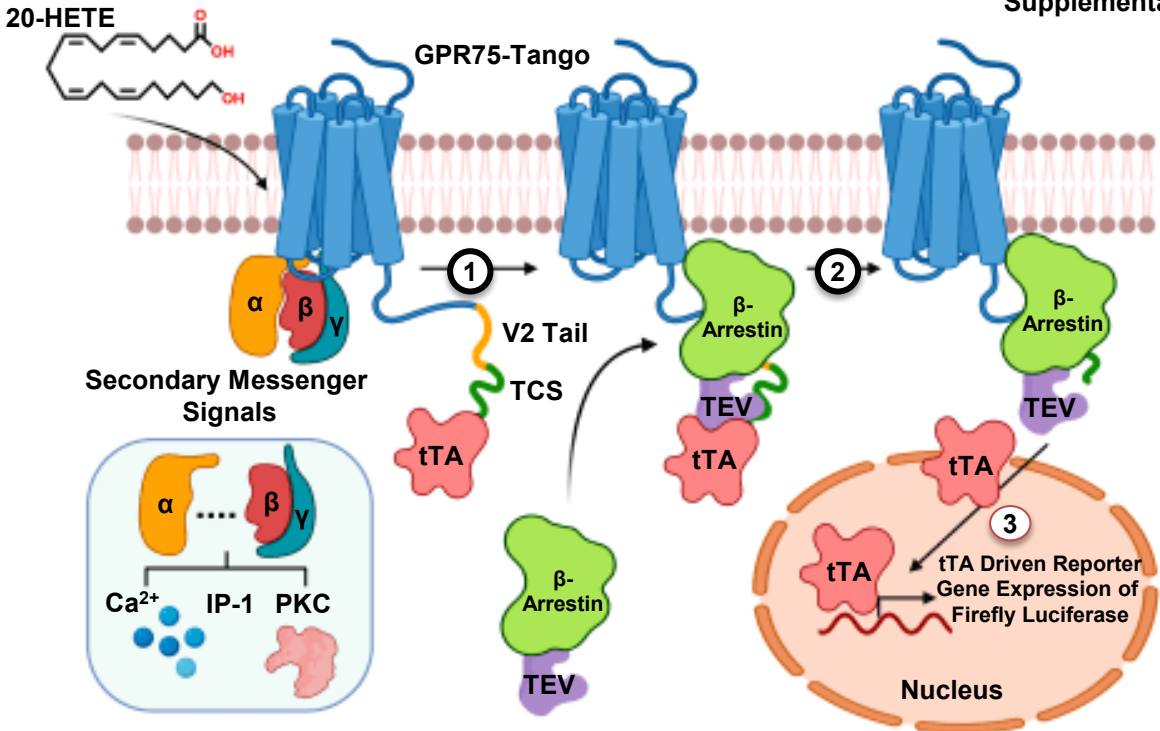

A

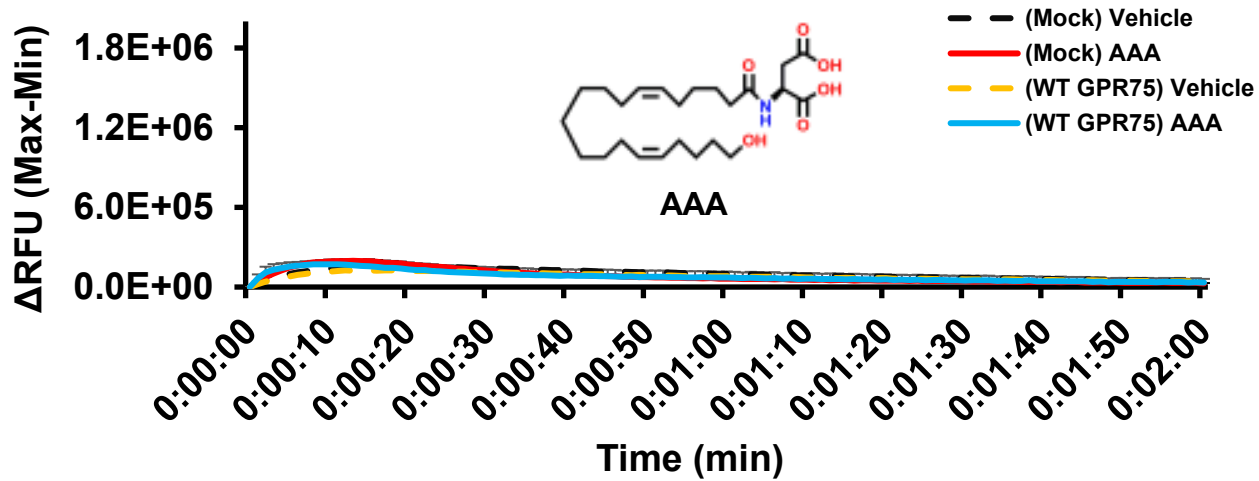

B

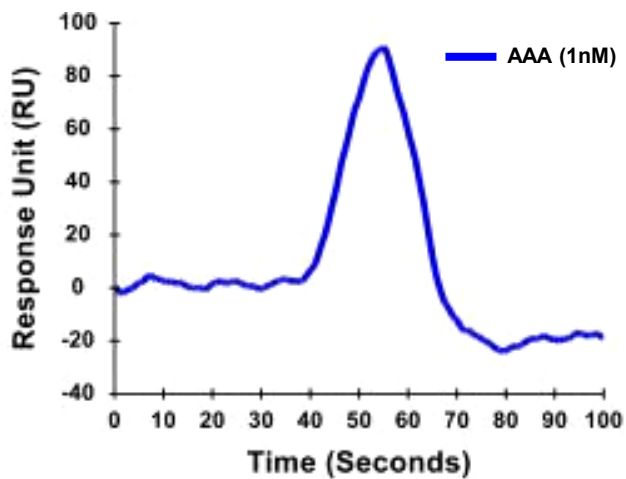

C

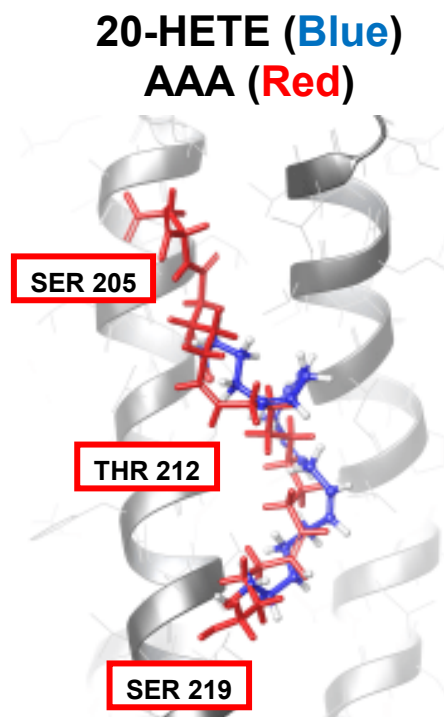

D

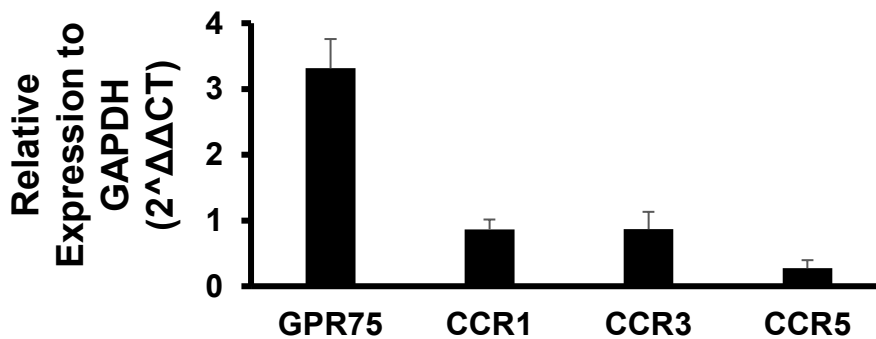

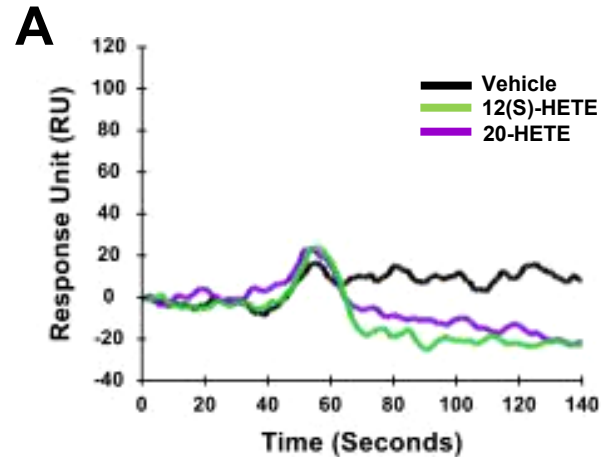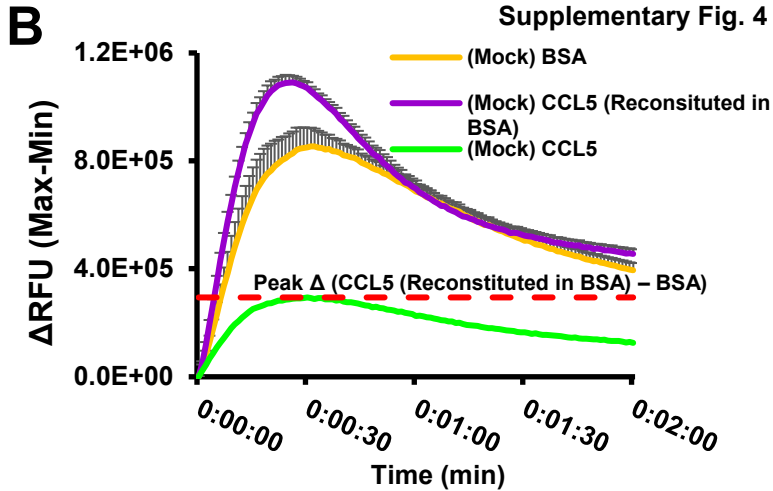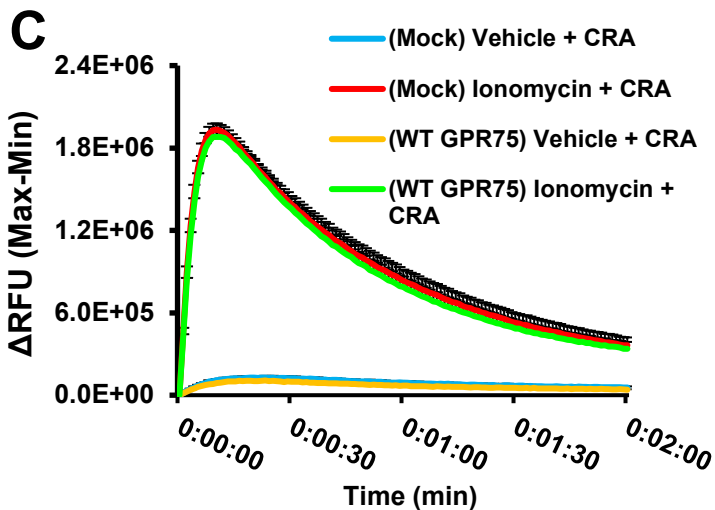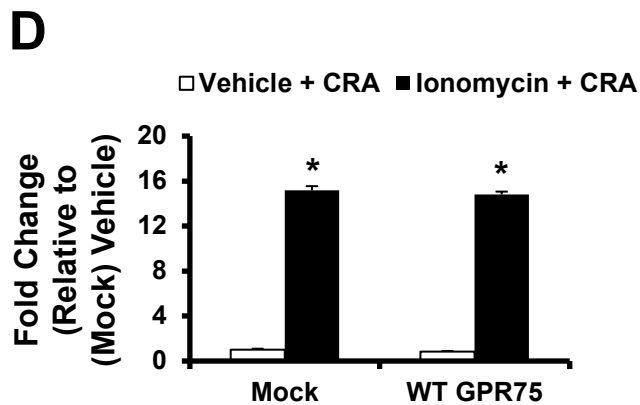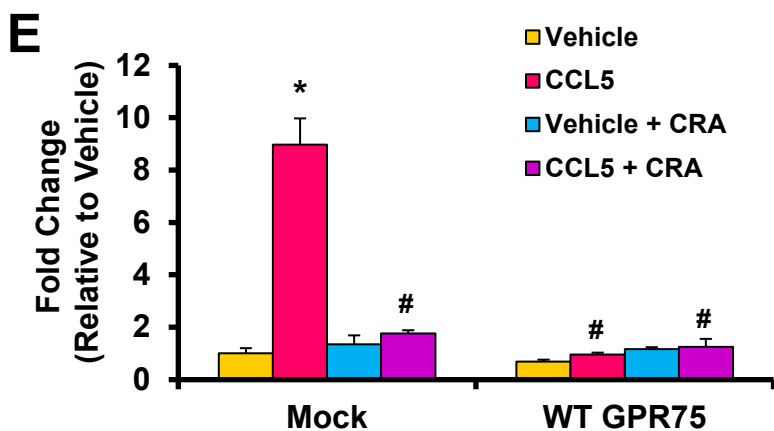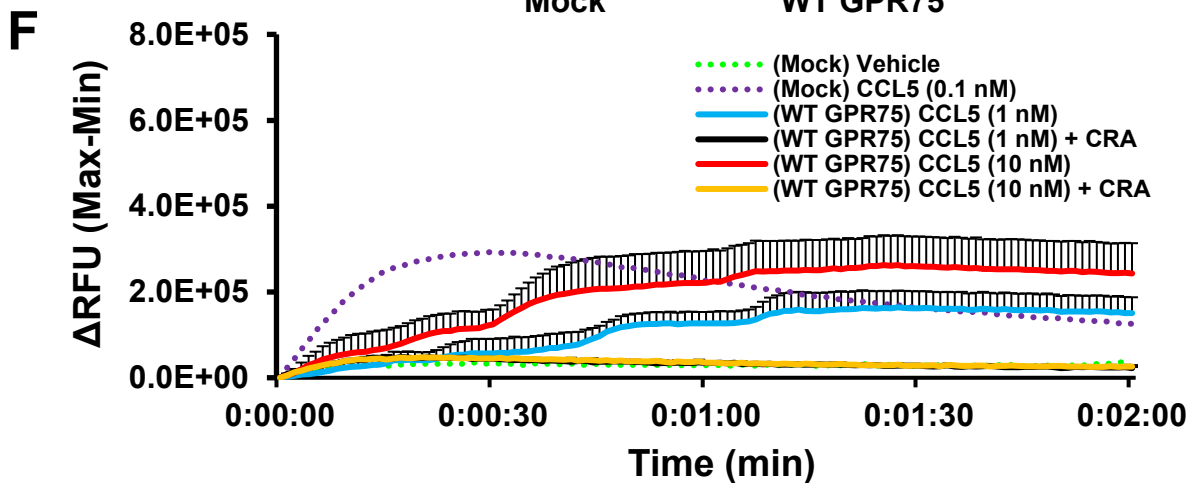

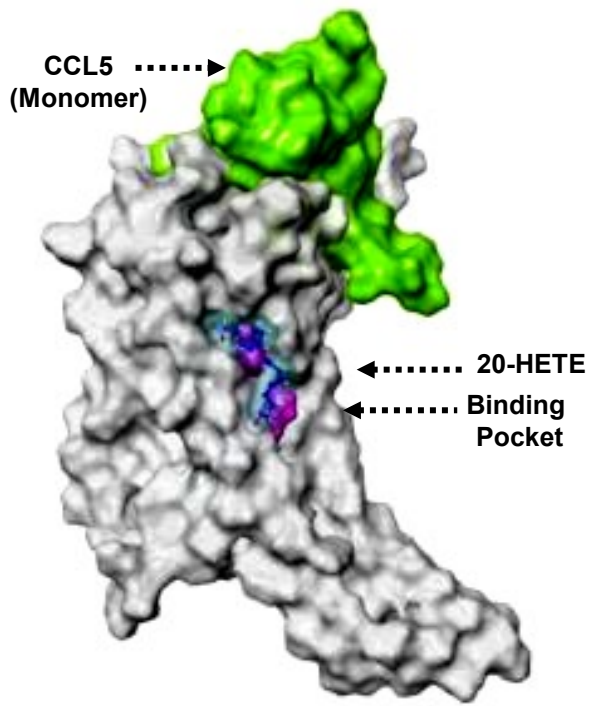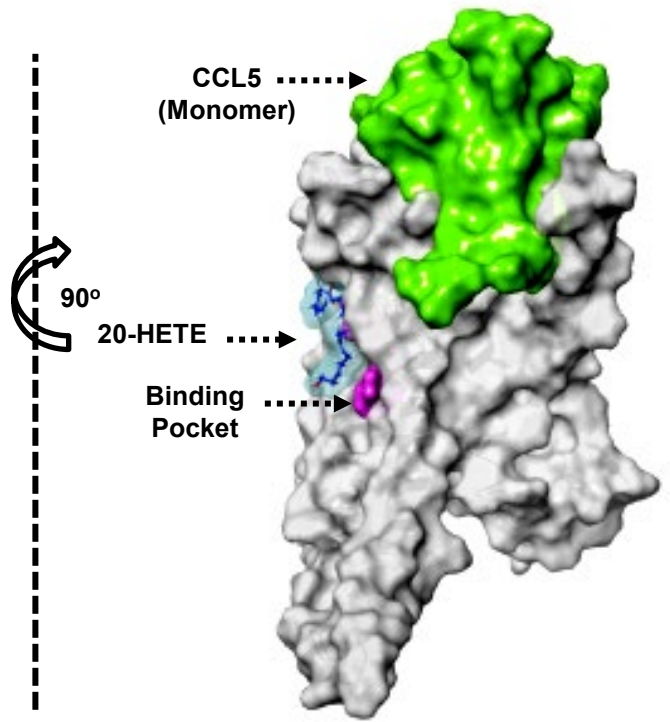

A

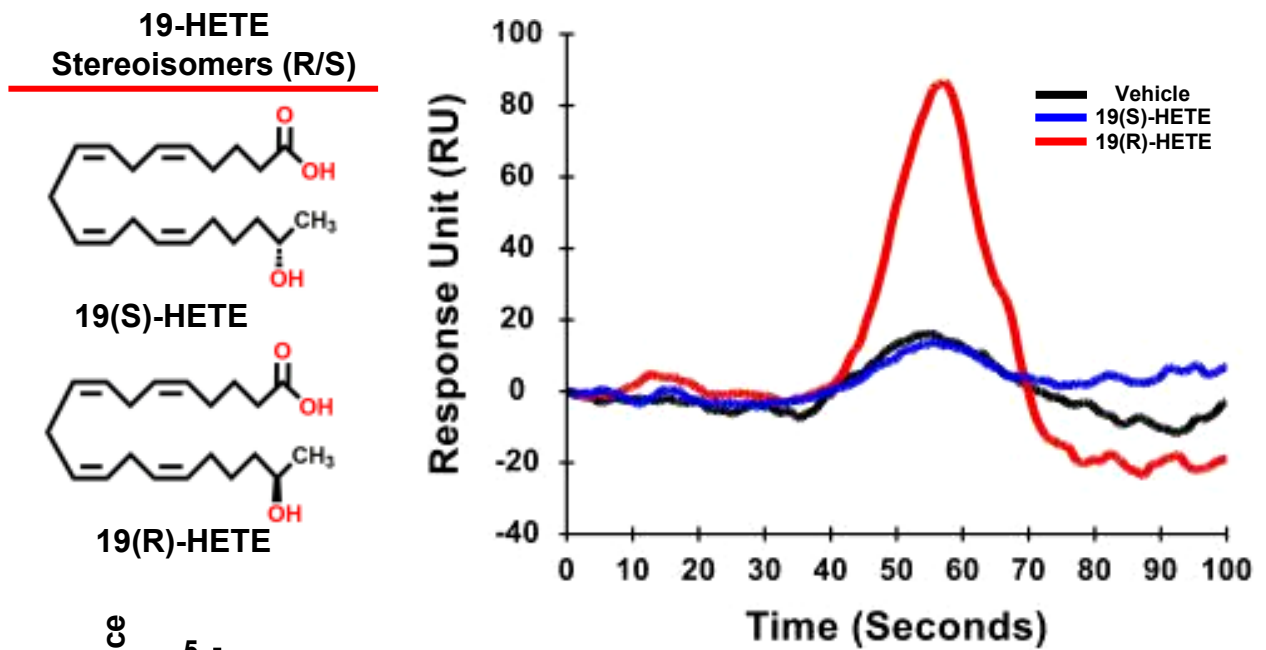

B

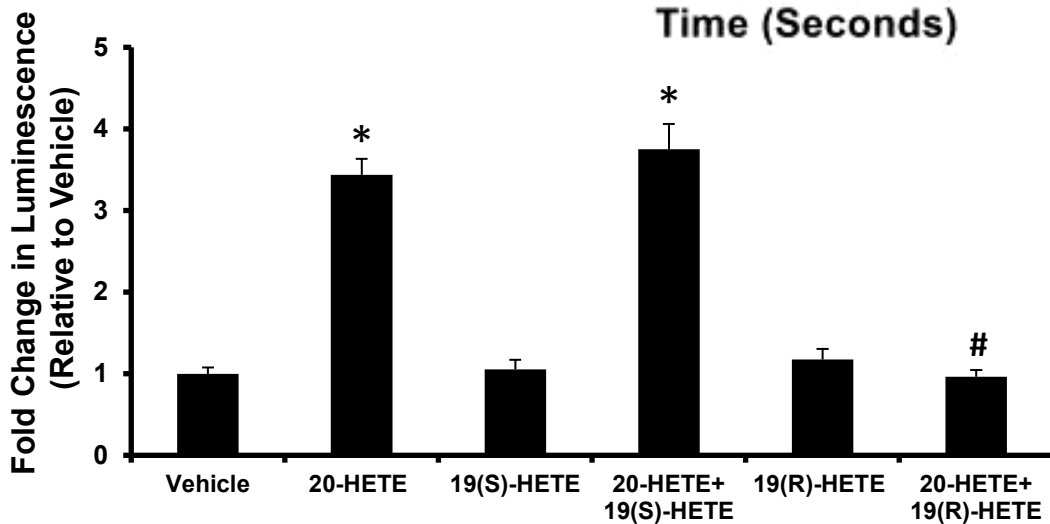

C

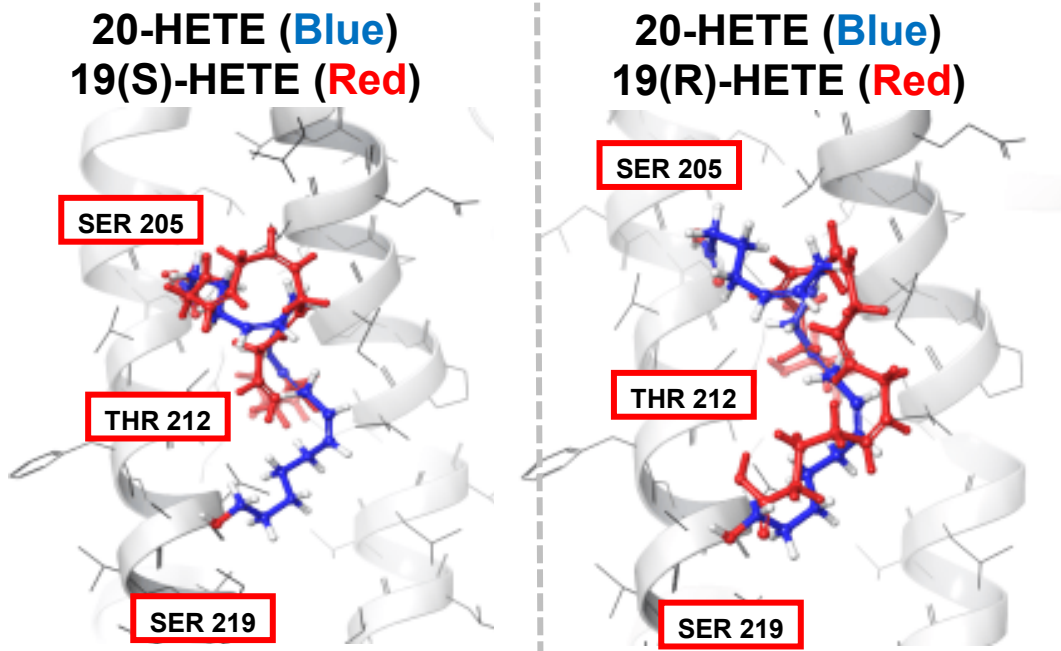

A

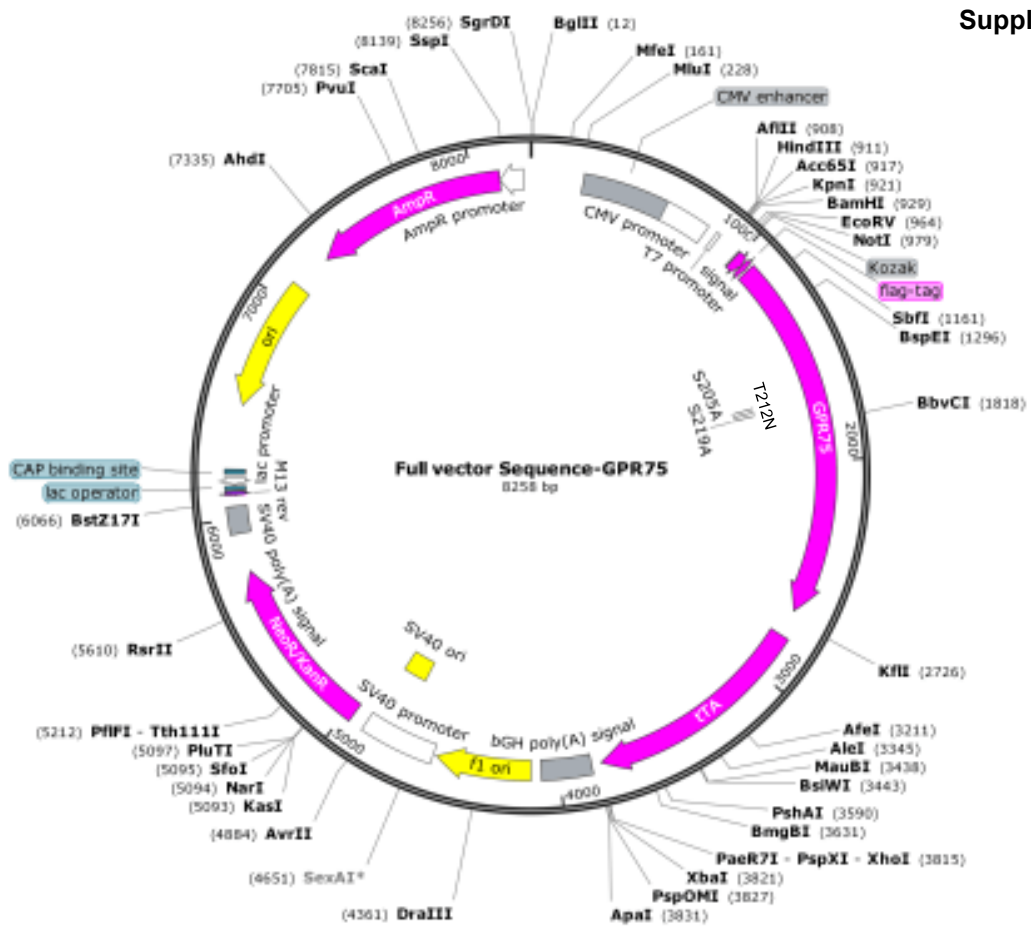

B

Mock

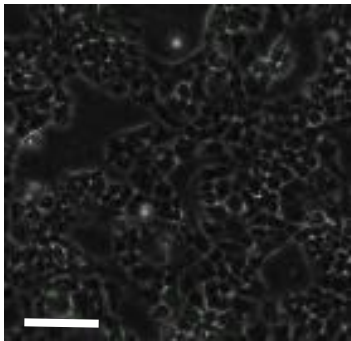

WT GPR75

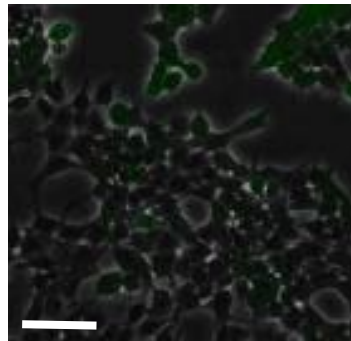

S205A GPR75

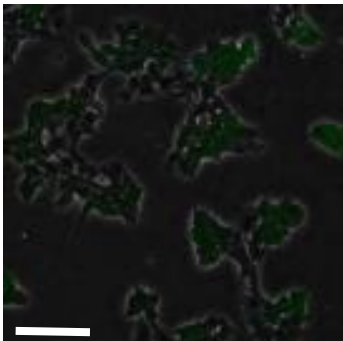

T212N GPR75

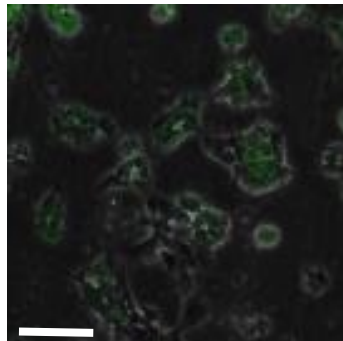

S219A GPR75

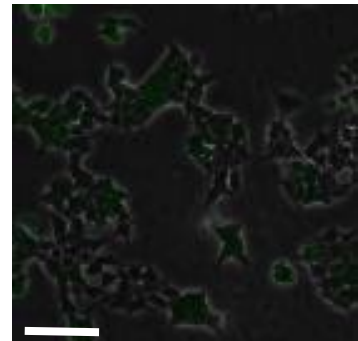

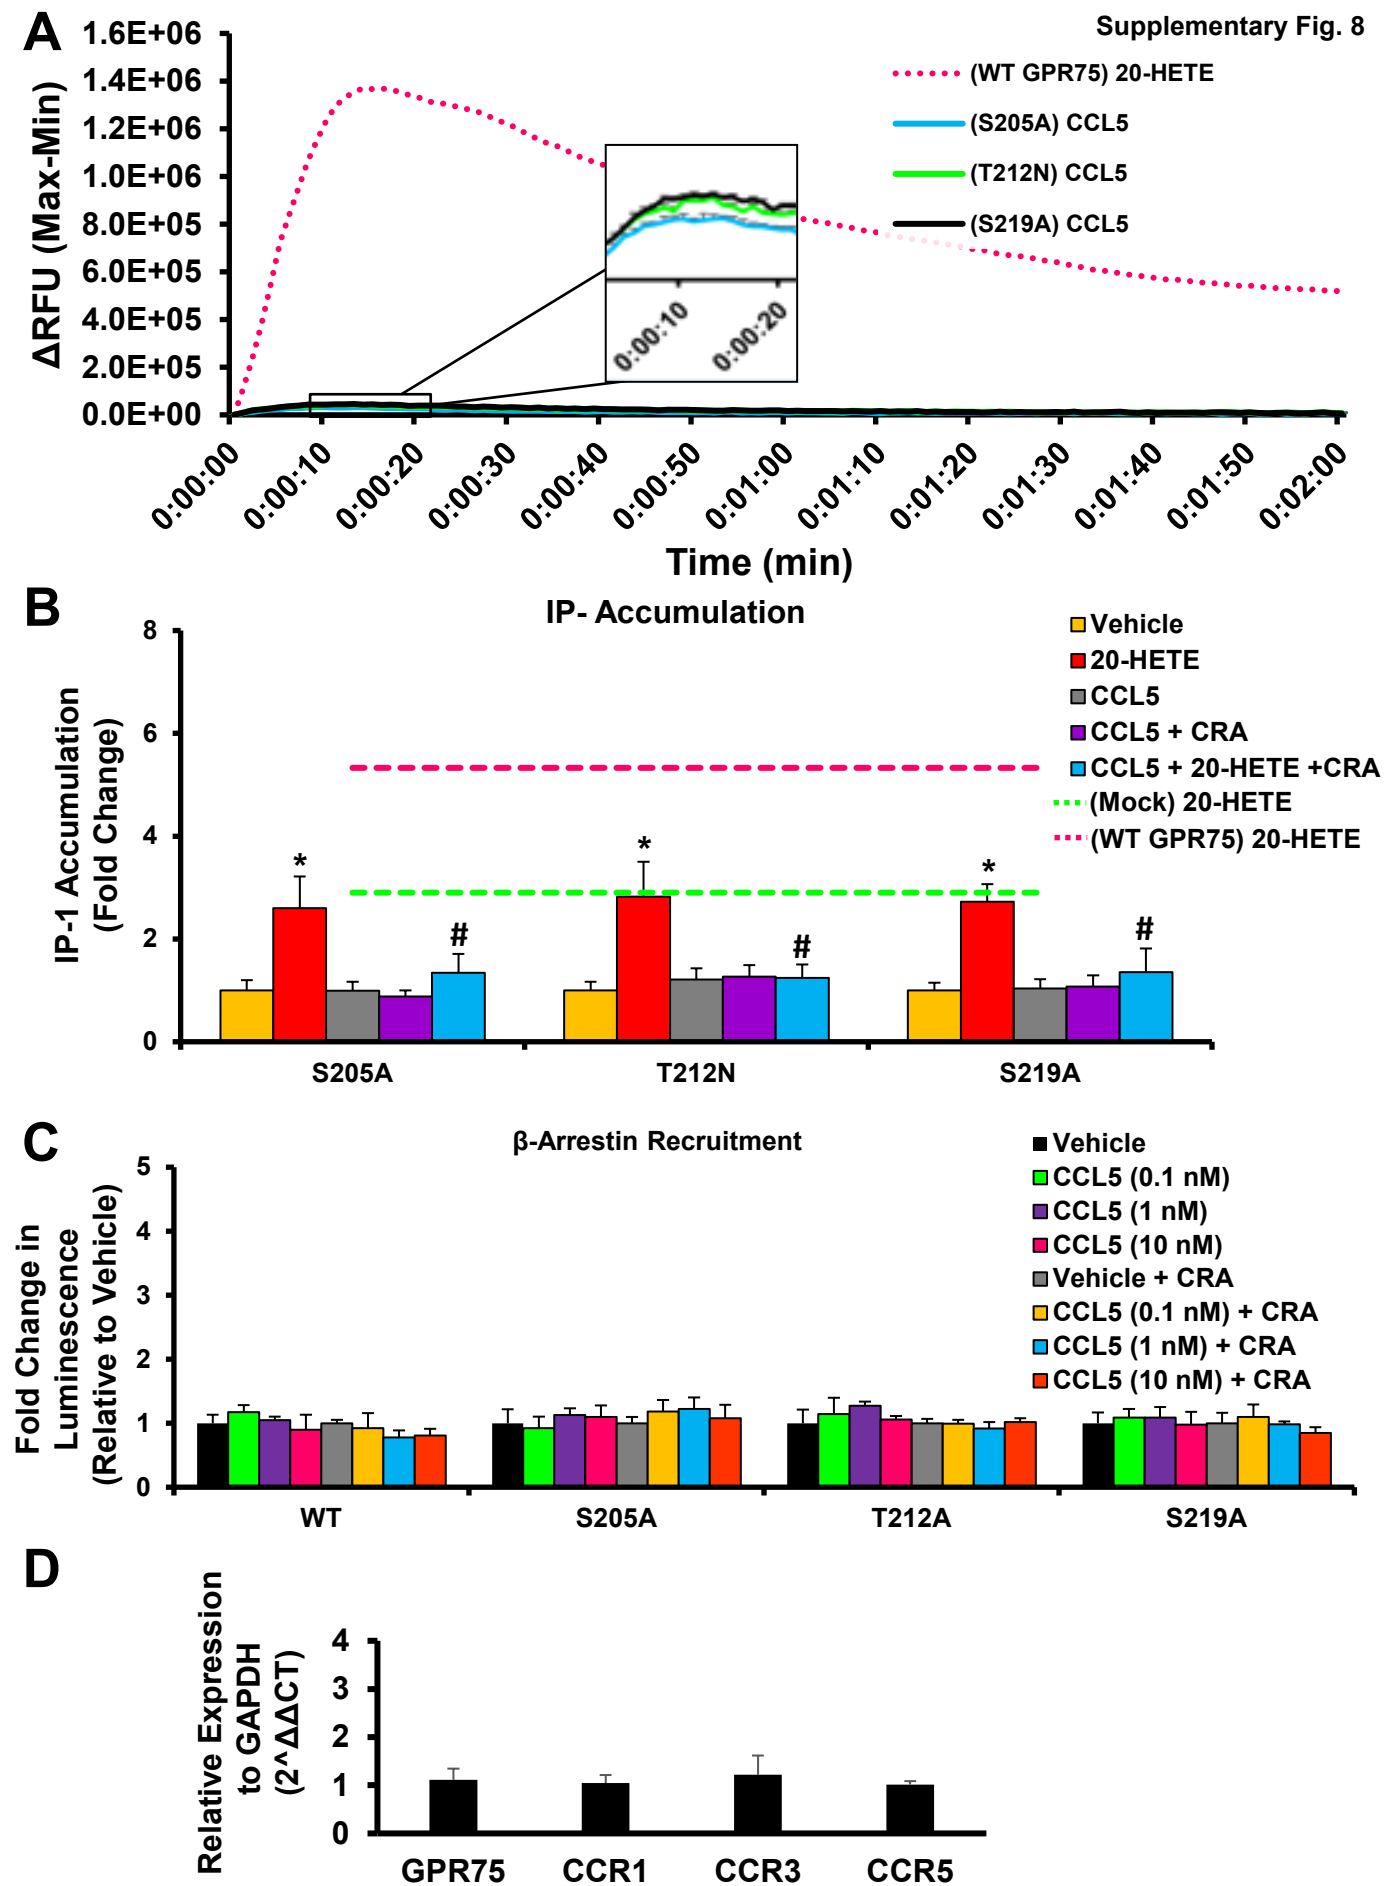



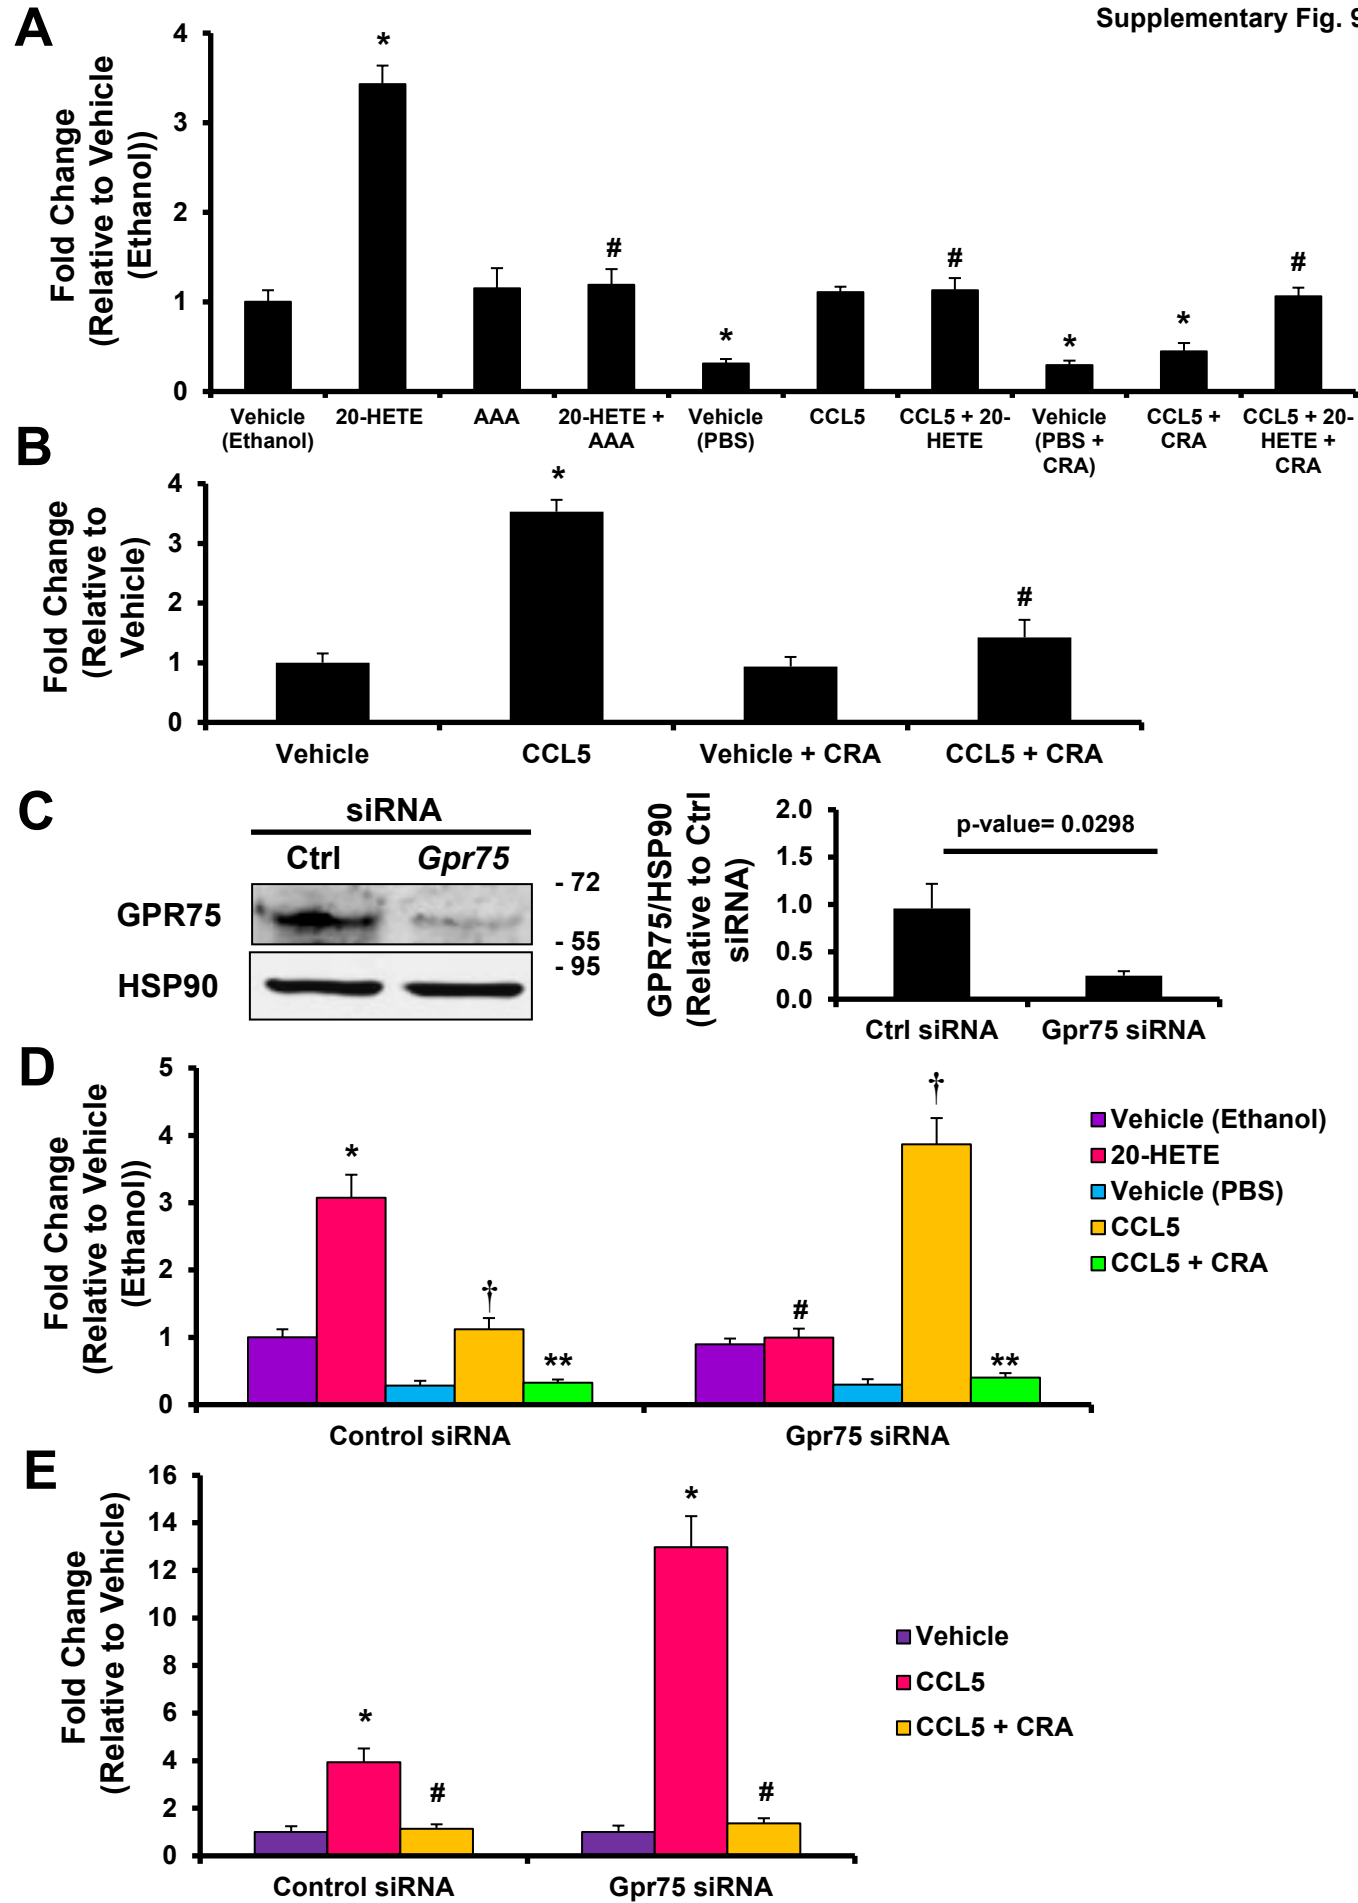

Supplement: NIHMS1888740-supplement-supplement.pdf [file NIHMS1888740-supplement-supplement.pdf]
